# Supplementary material
Source: PubMed Central journal article supplement (PMC8604374)
Supplement: NIHMS1755494-supplement-Supplementary_material.pdf [file NIHMS1755494-supplement-Supplementary_material.pdf]

## **Supplementary Information**

### **MAOA Promotes Prostate Cancer Cell Perineural Invasion through SEMA3C/PlexinA2/NRP1-cMET Signaling**

**Lijuan Yin, Jingjing Li, Jing Wang, Tianjie Pu, Jing Wei, Qinlong Li, Boyang Jason Wu**

#### **Supplementary Data**

**Supplementary Figure 1, related to Figure 3**

**Supplementary Table 1, related to Figure 3**

**Supplementary Table 2, related to Figure 4**

#### **Supplementary Materials and Methods**

#### **Supplementary References**

## Supplementary Fig. 1

**a**

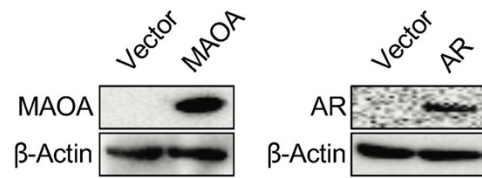

**b**

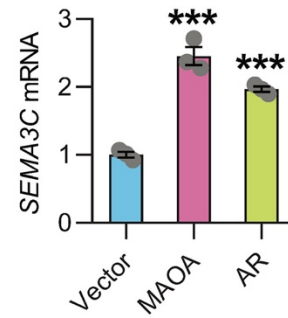

**Supplementary Fig. 1** MAOA and AR induce SEMA3C in PC cells. **a** Western blot analysis of MAOA and AR in PC-3 cells with enforced expression of MAOA or AR. **b** RT-qPCR analysis of SEMA3C mRNA levels in PC-3 cells described in a. Data represent the mean  $\pm$  SEM. \*\* $p$ <0.01.

**Supplementary Table 1**

| Sample Number | MAOA (intensity counts/cell) | SEMA3C (intensity counts/cell) |
|---------------|------------------------------|--------------------------------|
| 1             | 0.058                        | 0.058                          |
| 2             | 0.176                        | 0.051                          |
| 3             | 0.037                        | 0.029                          |
| 4             | 0.059                        | 0.039                          |
| 5             | 0.043                        | 0.042                          |
| 6             | 0.035                        | 0.027                          |
| 7             | 0.029                        | 0.035                          |
| 8             | 0.040                        | 0.048                          |
| 9             | 0.043                        | 0.032                          |
| 10            | 0.083                        | 0.031                          |
| 11            | 0.086                        | 0.035                          |
| 12            | 0.049                        | 0.029                          |
| 13            | 0.117                        | 0.043                          |
| 14            | 0.049                        | 0.031                          |
| 15            | 0.058                        | 0.031                          |
| 16            | 0.020                        | 0.042                          |
| 17            | 0.015                        | 0.020                          |
| 18            | 0.060                        | 0.027                          |
| 19            | 0.027                        | 0.023                          |
| 20            | 0.025                        | 0.022                          |
| 21            | 0.053                        | 0.025                          |
| 22            | 0.036                        | 0.017                          |
| 23            | 0.017                        | 0.023                          |
| 24            | 0.089                        | 0.057                          |
| 25            | 0.042                        | 0.014                          |
| 26            | 0.028                        | 0.019                          |
| 27            | 0.034                        | 0.024                          |
| 28            | 0.020                        | 0.022                          |
| 29            | 0.055                        | 0.030                          |
| 30            | 0.043                        | 0.017                          |
| 31            | 0.046                        | 0.026                          |
| 32            | 0.058                        | 0.023                          |
| 33            | 0.072                        | 0.024                          |
| 34            | 0.014                        | 0.019                          |
| 35            | 0.043                        | 0.018                          |
| 36            | 0.082                        | 0.024                          |
| 37            | 0.061                        | 0.025                          |
| 38            | 0.037                        | 0.026                          |
| 39            | 0.065                        | 0.023                          |
| 40            | 0.043                        | 0.030                          |

**Supplementary Table 1** Quantification of IHC staining of MAOA and SEMA3C in serial sections of a PC TMA, related to Figure 3. Average cell-based staining intensity counts for each protein were analyzed by inForm software.

**Supplementary Table 2**

| <b>Membrane Position</b> | <b>Target Protein</b> | <b>Phosphorylation Site</b> | <b>Intensity (Vector)</b> | <b>Intensity (MAOA)</b> | <b>Ratio (MAOA/Vector)</b> |
|--------------------------|-----------------------|-----------------------------|---------------------------|-------------------------|----------------------------|
| A3, A4                   | p38 $\alpha$          | T180/Y182                   | 10.991                    | 13.897                  | 1.264                      |
| A5, A6                   | ERK1/2                | T202/Y204, T185/Y187        | 8.178                     | 9.530                   | 1.165                      |
| A7, A8                   | JNK1/2/3              | T183/Y185, T221/Y223        | 64.941                    | 62.816                  | 0.967                      |
| A9, A10                  | GSK3 $\alpha/\beta$   | S21/S9                      | 79.967                    | 80.307                  | 1.004                      |
| A13, A14                 | p53                   | S392                        | 27.509                    | 28.523                  | 1.037                      |
| B3, B4                   | EGFR                  | Y1086                       | 15.599                    | 15.288                  | 0.980                      |
| B5, B6                   | MSK1/2                | S376/S360                   | 20.844                    | 25.010                  | 1.200                      |
| B7, B8                   | AMPK $\alpha$ 1       | T183                        | 19.143                    | 15.602                  | 0.815                      |
| B9, B10                  | AKT1/2/3              | S473                        | 44.051                    | 46.606                  | 1.058                      |
| B11, B12                 | AKT1/2/3              | T308                        | 21.890                    | 24.149                  | 1.103                      |
| B13, B14                 | p53                   | S46                         | 30.448                    | 30.278                  | 0.994                      |
| C1, C2                   | TOR                   | S2448                       | 19.643                    | 20.189                  | 1.028                      |
| C3, C4                   | CREB                  | S133                        | 21.793                    | 27.786                  | 1.275                      |
| C5, C6                   | HSP27                 | S78/S82                     | 13.886                    | 14.187                  | 1.022                      |
| C7, C8                   | AMPK $\alpha$ 2       | T172                        | 28.495                    | 30.580                  | 1.073                      |
| C9, C10                  | $\beta$ -Catenin      | —                           | 28.978                    | 29.495                  | 1.018                      |
| C11, C12                 | p70 S6 Kinase         | T389                        | 24.934                    | 20.650                  | 0.828                      |
| C13, C14                 | p53                   | S15                         | 23.474                    | 24.095                  | 1.026                      |
| C15, C16                 | c-Jun                 | S63                         | 31.772                    | 27.974                  | 0.880                      |
| D1, D2                   | Src                   | Y419                        | 31.740                    | 32.334                  | 1.019                      |
| D3, D4                   | Lyn                   | Y397                        | 8.980                     | 9.411                   | 1.048                      |
| D5, D6                   | Lck                   | Y394                        | 9.289                     | 9.492                   | 1.022                      |
| D7, D8                   | STAT2                 | Y689                        | 29.221                    | 27.840                  | 0.953                      |
| D9, D10                  | STAT5 $\alpha$        | Y694                        | 15.083                    | 16.659                  | 1.104                      |
| D11, D12                 | P70 S6 Kinase         | T421/S424                   | 24.854                    | 19.769                  | 0.795                      |
| D13, D14                 | RSK1/2/3              | S380/S386/S377              | 16.067                    | 18.392                  | 1.145                      |
| D15, D16                 | eNOS                  | S1177                       | 15.630                    | 19.687                  | 1.260                      |
| E1, E2                   | Fyn                   | Y420                        | 10.835                    | 11.090                  | 1.024                      |
| E3, E4                   | Yes                   | Y426                        | 18.856                    | 15.980                  | 0.847                      |
| E5, E6                   | Fgr                   | Y412                        | 5.448                     | 6.618                   | 1.215                      |
| E7, E8                   | STAT6                 | Y641                        | 29.472                    | 29.185                  | 0.990                      |
| E9, E10                  | STAT5b                | Y699                        | 11.207                    | 11.468                  | 1.023                      |
| E11, E12                 | STAT3                 | Y705                        | 27.158                    | 24.347                  | 0.896                      |
| E13, E14                 | p27                   | T198                        | 17.143                    | 13.779                  | 0.804                      |
| E15, E16                 | PLC- $\gamma$ 1       | Y783                        | 16.675                    | 18.833                  | 1.129                      |
| F1, F2                   | Hck                   | Y411                        | 16.833                    | 19.516                  | 1.159                      |
| F3, F4                   | Chk-2                 | T68                         | 28.846                    | 18.087                  | 0.627                      |
| F5, F6                   | FAK                   | Y397                        | 24.606                    | 22.536                  | 0.916                      |
| F7, F8                   | PDGFR $\beta$         | Y751                        | 9.758                     | 10.306                  | 1.056                      |
| F9, F10                  | STAT5a/b              | Y694/Y699                   | 32.397                    | 34.191                  | 1.055                      |
| F11, F12                 | STAT3                 | S727                        | 12.842                    | 11.939                  | 0.930                      |
| F13, F14                 | WNK1                  | T60                         | 29.387                    | 27.439                  | 0.934                      |
| F15, F16                 | PYK2                  | Y402                        | 17.935                    | 18.937                  | 1.056                      |

|          |        |      |        |        |       |
|----------|--------|------|--------|--------|-------|
| G3, G4   | PRAS40 | T246 | 76.004 | 70.074 | 0.922 |
| G11, G12 | HSP60  | —    | 47.729 | 59.254 | 1.241 |

**Supplementary Table 2.** Quantification of phosphoprotein expression levels in a phospho-kinase antibody array from control and MAOA-OE PC-3 cells, related to Figure 4. Average chemiluminescent signal intensity of a pair of duplicate spots representing each phosphorylated kinase protein is shown.

## Supplementary Materials and Methods

### Plasmids and reagents

A human MAOA lentiviral expression construct was generated by insertion of the human MAOA coding region at *EcoRI/XbaI* sites in pLVX-AcGFP1-N1 vector (Clontech) containing a puromycin-resistant gene. The pCMV-MAOA expression construct was generated as described previously [1]. The pcDNA-AR expression construct was kindly provided by Gerhard Coetzee (University of Southern California). The human 1.5-kb *SEMA3C* promoter *Gaussia* luciferase reporter construct that simultaneously expresses secreted alkaline phosphatase (SEAP) as an internal control for signal normalization was purchased from GeneCopoeia. Human MAOA and non-target control shRNA lentiviral particles were purchased from Sigma-Aldrich. The lentiviral expression construct expressing the *Firefly* luciferase gene for labeling PC cells were purchased from GenTarget. *Twist1* and *cMET* siRNAs were purchased from Santa Cruz. *SEMA3C*, *PlexinA2* and *NRP1* siRNAs were purchased from Origene. Clorgyline and forskolin were purchased from Sigma-Aldrich. Recombinant human NGF protein was purchased from Thermo Fisher Scientific. NGF protein levels in culture media were quantified by ELISA (PeproTech).

### Generation of stable knockdown and overexpression cells

Stable shRNA-mediated MAOA knockdown was achieved by infecting cells with lentiviral particles expressing MAOA shRNA TRCN0000046009 (shMAOA#1, mainly used in this study and usually dubbed “shMAOA”) or TRCN0000046011 (shMAOA#2), followed by 2-week puromycin selection (2 µg/ml) for establishing stable cell lines. A non-target control shRNA (shCon) was used as control in stable knockdown cells. Lentivirus production was performed for stable OE of MAOA in LAPC4 cells. Briefly, 293T cells were co-transfected with a MAOA-expressing lentiviral construct, pCMV delta R8.2 (Addgene) and pVSVG (Addgene) in a 4:2:1 ratio using Lipofectamine 2000 reagent (Thermo Fisher Scientific) following the manufacturer’s instructions. The medium was changed 6 hrs after transfection. The medium containing lentivirus was harvested 48 hrs after transfection. Viral particles were concentrated and purified using a Lenti-X concentrator (Takara Bio). LAPC4 cells were infected with lentivirus in the presence of 8 µg/ml polybrene followed by 2-week puromycin selection (2 µg/ml). An empty lentiviral construct was used as a control for stable OE cells. Stable OE of MAOA in PC-3 cells were generated as described previously [1].

### Biochemical analyses

Total RNA was isolated using the RNeasy Mini Kit (Qiagen) and reverse-transcribed to cDNA by M-MLV reverse transcriptase (Promega) following the manufacturers’ instructions followed by qPCR. Details on primers and methods used for qPCR are provided below. For immunoblots, cells were extracted with RIPA buffer in the presence of a protease/phosphatase inhibitor cocktail (Thermo Fisher Scientific), and blots were performed as described previously [2] using primary antibodies against MAOA (H-70 or G-10, Santa Cruz), *SEMA3C* (PA5-75455, Thermo Fisher Scientific), *PlexinA2* (D44D4, Cell Signaling), *NRP1* (C-19, Santa Cruz), p-cMET (D26, Cell Signaling), cMET (C-12, Santa Cruz), *Twist1* (10E4E6, Novus Biologicals), AR (441, Santa Cruz), GAPDH (14C10, Cell Signaling) or β-Actin (AC-15, Santa Cruz).

### Luciferase reporter assay

To determine the effects of MAOA and *Twist1* on *SEMA3C* promoter, PC-3 cells subjected to manipulation of MAOA and *Twist1* levels were transfected with *SEMA3C* *Gaussia* luciferase promoter that simultaneously expresses SEAP to normalize for transfection efficiency. After 24-48 hrs following transfection, relative light units were calculated as the ratio of *Gaussia* luciferase to SEAP activity by a Secret-Pair Dual Luminescence kit (GeneCopoeia).

### Quantitative real-time PCR

qPCR was conducted using SYBR Green PCR Master Mix and run with the Applied Biosystems 7500 Fast Real-Time PCR System (Thermo Fisher Scientific). PCR conditions included an initial denaturation step of 3 min at 95°C, followed by 40 cycles of PCR consisting of 30 s at 95°C, 30 s at 60°C, and 30 s at 72°C. The PCR data were analyzed by 2<sup>- $\Delta\Delta$ CT</sup> method [3].

| Gene          | Forward                    | Reverse                |
|---------------|----------------------------|------------------------|
| <i>SEMA3A</i> | GGTAACTAGGATTGTCTGTC       | GTGATCACATTGTTGGATTC   |
| <i>SEMA3B</i> | ATGCCTACAACCGCACCCA        | GGTGGCCCACTTCCACAAAG   |
| <i>SEMA3C</i> | ATCGAGTGAACGCTGCTGATG      | GCTCGCCACTGACAGAGTTGTT |
| <i>SEMA3D</i> | TGGAATTGTCTCTGAAGCAGCA     | TGCGCAAGCTTTCCCATAAG   |
| <i>SEMA3E</i> | CAACAGGCACACATGCAA         | GTCTTATCCAAAGCATCCC    |
| <i>SEMA3F</i> | ACCAGTGGATGCCCTTCT         | GCGCATGAAGTTGATCAC     |
| <i>SEMA3G</i> | GCTCAAAGTCATCGCTCTCCAG     | CATTCGGTGATAGGTGTTGGC  |
| <i>PLXNA1</i> | TCCTGGTGGACCTCTCAAAC       | ACTGCACACAGCTCTCCACA   |
| <i>PLXNA2</i> | CATCTCGTACTGGACCCAC        | TTTACAACGGCTACAGCGTG   |
| <i>PLXNA3</i> | ACCACGAAGGCACGGAAG         | AGCCAGCGGAGGGACAG      |
| <i>PLXNA4</i> | TCTCAGTACAACGTGCTG         | TAGCACTGGATCTGATTGC    |
| <i>NRP1</i>   | AAGGTTTCTCAGCAAACACTACAGTG | GGGAAGAAGCTGTGATCTGGTC |
| <i>NRP2</i>   | GGATGGCATTCCACATGTTG       | ACCAGGTAGTAACGCGCAGAG  |

### Chromatin immunoprecipitation assay

Chromatin immunoprecipitation assay was used to determine the association of endogenous Twist1 protein with a Twist1-binding sequence of *SEMA3C* promoter identified from analysis of a published ChIP-seq dataset in control and MAOA-OE PC-3 cells by a SimpleChIP Enzymatic Chromatin IP kit (Cell Signaling) following the manufacturer's instructions. Briefly, the chromatin was crosslinked with nuclear proteins, enzymatically digested with micrococcal nuclease followed by sonication, and immunoprecipitated with anti-Twist1 (Twist2C1a, Abcam) antibody. Normal IgG included in the kit was used as a negative control for IP. After being pelleted with agarose beads and purified, the immunoprecipitates were subjected to qPCR with a pair of primers specifically targeting the *SEMA3C* proximal promoter region encompassing the Twist1-binding sequence. Primer sequences for *SEMA3C* promoter region are forward 5'-GGGCGAGCGCTCTTGGTGTC-3' and reverse 5'-TGCAGAAAGGAGCAGGGTTGCG-3'. Primers sequences for *SEMA3C* exon 2 serving as negative control are forward 5'-ACTTCAGCCTTTCCCACCATCC-3' and reverse 5'-TCAGGGAAAGAATGTGATCTTTGCT-3'.

### Proximity ligation assay

Cells were seeded on chamber slides. The cells were fixed with 4% formaldehyde for 10 min at room temperature, washed twice with PBS containing 0.02% Tween 20, and permeabilized with 0.5% Triton X-100/PBS solution (blocking solution) for 30 min at room temperature. Primary antibodies against PlexinA2 (A-2, mouse IgG, Santa Cruz), NRP1 (A-12, mouse IgG, Santa Cruz) or cMET (C-12, rabbit IgG, Santa Cruz) were incubated in blocking solution at 4°C overnight. The proximity ligation assay was then performed with the Duolink *In Situ* Red Starter Kit Mouse/Rabbit (Duolink, Sigma-Aldrich) according to the manufacturer's instructions. Anti-mouse MINUS and anti-rabbit PLUS PLA probes (Duolink) were used. Images were acquired by a Nikon Ti-E inverted microscope using a x40 objective and analyzed for cytoplasmic fluorescence signals per cell with inForm software (PerkinElmer).

### Immunohistochemistry and multiple quantum dot labeling analyses

IHC analysis of clinical and xenograft tumor samples was performed using antibodies against MAOA (H-70, Santa Cruz), cleaved caspase 3 (Asp175, Cell Signaling), NGF (2046, Cell

Signaling), SEMA3C (PA5-75455, Thermo Fisher Scientific) or p-cMET (44-888G, Thermo Fisher Scientific). The IHC staining protocol was modified for multiple QD labeling as described previously [4]. Xenograft tumor samples were stained with antibodies against Ki-67 (SP6, Abcam), NF-L (C28E10, Cell Signaling) and NF-H (RMdO 20, Cell Signaling) sequentially by single QD labeling. Cell-based averages of MAOA and SEMA3C staining in TMAs and QD signal intensity counts for Ki-67, NF-L and NF-H in xenograft tumor samples were analyzed by inForm or HALO (Indica Labs) software, both enabling automated per-cell analysis of stained samples, after areas of interest were defined using manual tissue segmentation by a pathologist.

### **Bioinformatics analysis**

The ChIP-seq dataset GSE80151 available in Gene Expression Omnibus was analyzed for Twist1-binding region in *SEMA3C* genomic sequences by TACGenomics. Bowtie was used to map the human hg19 genome and unique mapped reads were used for peak calling. MACS2 was used to perform the peak calling and ChIPseeker was used for peak annotation.



## Supplementary References

- 1 Wu JB, Shao C, Li X, Li Q, Hu P, Shi C *et al.* Monoamine oxidase A mediates prostate tumorigenesis and cancer metastasis. *J Clin Invest* 2014; 124: 2891-2908.
- 2 Wu JB, Chen K, Ou XM, Shih JC. Retinoic acid activates monoamine oxidase B promoter in human neuronal cells. *The Journal of biological chemistry* 2009; 284: 16723-16735.
- 3 Livak KJ, Schmittgen TD. Analysis of relative gene expression data using real-time quantitative PCR and the 2(-Delta Delta C(T)) Method. *Methods* 2001; 25: 402-408.
- 4 Hu P, Chu GC, Zhu G, Yang H, Luthringer D, Prins G *et al.* Multiplexed quantum dot labeling of activated c-Met signaling in castration-resistant human prostate cancer. *PloS one* (Research Support, N.I.H., Extramural Research Support, Non-U.S. Gov't) 2011; 6: e28670.
